# Supplementary material for: Identification of Sugarcane Host Factors Interacting with the 6K2 Protein of the Sugarcane Mosaic Virus
Source: PubMed Central journal article supplement (PMC6719097; doi:10.3390/ijms20163867), 2019-08-08
Supplement: ijms-20-03867-s001.pdf [file ijms-20-03867-s001.pdf]

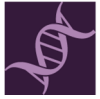

1

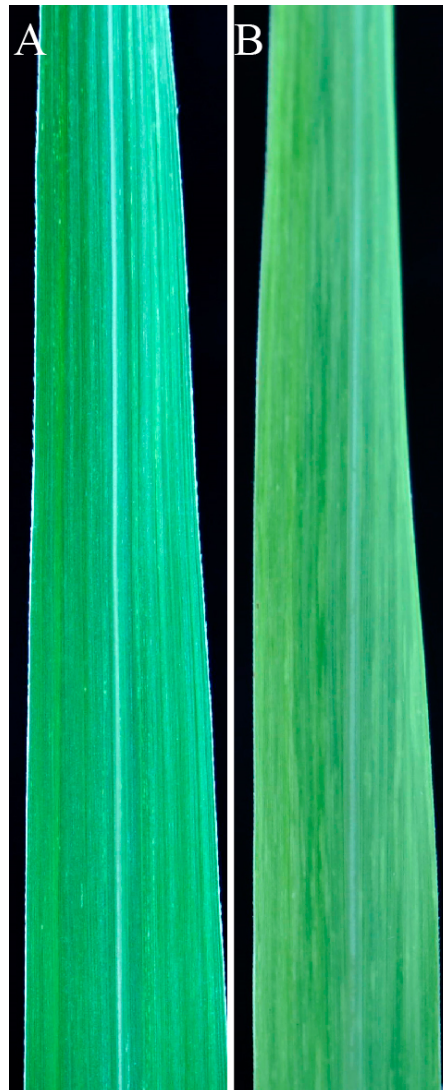

2

**Figure 1.** Mosaic symptom on the leaves of sugarcane cultivar ROC22. The healthy leaf was shown in (A) and the mosaic leaf was shown in (B).

3

Table S1. Primers used in this study.

| Genes     | Primers            | Primer sequences*                                        | Strategy/Constructs      |
|-----------|--------------------|----------------------------------------------------------|--------------------------|
| SCMV-6K2  | 6K2-F              | 5'-ATGGGAATGGATGCAACAGC-3'                               | pPOTO-6K2                |
|           | 6K2-R              | 5'-CCCCTGGTGGCAGACGTTTGTGC-3'                            |                          |
| SCMV-6K2  | pBT3-STE-6K2-F     | 5'-ATTACCAAGGCCATTACGGCCATGGGAATGGATGCAACAGC-3'          | pBT3-STE-6K2             |
|           | pBT3-STE-6K2-R     | 5'-AACTGATTGGCCGAGGCGCCCCCTGGTGGCAGACGTTTGTGC-3'         |                          |
| SCMV-6K2  | Gateway-6K2-F      | 5'-GGGGACAAGTTTGTACAAAAAAGCAGGCTTCATGGGAATGGATGCAACAG-3' | pEarleyGate102-6K2       |
|           | Gateway-6K2-R      | 5'-GGGGACCACTTTGTACAAGAAAGCTGGGTCTGGTGGCAGACGTTTGTGC-3'  |                          |
|           | pPR3-N-F           | 5'-GTCGAAAATTCAAGACAAGG-3'                               | Yeast plasmid sequencing |
|           | pPR3-N-R           | 5'-AAGCGTGACATAACTAATTAC-3'                              |                          |
| ScPsbS    | ScPsbS-F           | 5'-ATGGCGCAGTCCATGCTCAT-3'                               | pPOTO-ScPsbS             |
|           | ScPsbS-R           | 5'-CTACTCTTCGTCCTCGCTGA-3'                               |                          |
| ScPsbS    | pPR3-N-ScPsbS-F    | 5'-ATTAACAAGGCCATTACGGCCATGGCGCAGTCCATGCTCAT-3'          | pPR3-N-ScPsbS            |
|           | pPR3-N-ScPsbS-R    | 5'-TTGACTAAGGCCGAGGCGCCGCTACTCTTCGTCCTCGCTGA-3'          |                          |
| ScTMEM208 | ScTMEM208          | 5'-ATGGCGAAGCAGGGGGCGAA-3'                               | pPOTO-ScTMEM208          |
|           | ScTMEM208          | 5'-TCAGCGAGTCCTAGTTTTGA-3'                               |                          |
| ScTMEM208 | pPR3-N-ScTMEM208-F | 5'-ATTAACAAGGCCATTACGGCCATGGCGAAGCAGGGGGCGAA-3'          | pPR3-N-ScTMEM208         |
|           | pPR3-N-ScTMEM208-R | 5'-TTGACTAAGGCCGAGGCGCCGTCAGCGAGTCCTAGTTTTGA-3'          |                          |
| ScPIP1;2  | ScPIP1;2-F         | 5'-ATGGAGGGGAAGGAGGAGGA-3'                               | pPOTO-ScPIP1;2           |
|           | ScPIP1;2-R         | 5'-TTAAGACCTGCTCTTGAAC-3'                                |                          |
| ScPIP1;2  | pPR3-N-ScPIP1;2-F  | 5'-ATTAACAAGGCCATTACGGCCATGGAGGGGAAGGAGGAGGA-3'          | pPR3-N-ScPIP1;2          |
|           | pPR3-N-ScPIP1;2-R  | 5'-TTGACTAAGGCCGAGGCGCCGTTAAGACCTGCTCTTGAAC-3'           |                          |
| ScPsbR    | ScPsbR-F           | 5'-ATGGCGGCCTCCATGATCTCGT-3'                             | pPOTO-ScPsbR             |
|           | ScPsbR-R           | 5'-TTAGCCGGAGAGGGCGCTG-3'                                |                          |

|           |                    |                                                   |                  |
|-----------|--------------------|---------------------------------------------------|------------------|
| ScPsbR    | pPR3-N-ScPsbR-F    | 5'-ATTAACAAGGCCATTACGGCCATGGCGGCCTCCATGATCTCGT-3' | pPR3-N-ScPsbR    |
|           | pPR3-N-ScPsbR-R    | 5'-TTGACTAAGGCCGAGGCGGCCGTTAGCCGGAGAGGGGCGCTG-3'  |                  |
| ScVAMP727 | ScVAMP727-F        | 5'-ATGATGAACAGCAGCAAGCAG-3'                       | pPOTO-ScVAMP727  |
|           | ScVAMP727-R        | 5'-CTAACATTTGAATCCCCTGCA-3'                       |                  |
| ScVAMP727 | pPR3-N-ScVAMP727-F | 5'-ATTAACAAGGCCATTACGGCCATGATGAACAGCAGCAAGCAG-3'  | pPR3-N-ScVAMP727 |
|           | pPR3-N-ScVAMP727-R | 5'-TTGACTAAGGCCGAGGCGGCCGCTAACATTTGAATCCCCTGCA-3' |                  |
| ScVHA-C   | ScVHA-C-F          | 5'-ATGTCGTCGGTATTCAGCG-3'                         | pPOTO-ScVHA-C    |
|           | ScVHA-C-R          | 5'-CTAATCTGCACGGGATTGG-3'                         |                  |
| ScVHA-C   | pPR3-N-ScVHA-C-F   | 5'-ATTAACAAGGCCATTACGGCCATGTCGTCGGTATTCAGCG-3'    | pPR3-N-ScVHA-C   |
|           | pPR3-N-ScVHA-C-R   | 5'-TTGACTAAGGCCGAGGCGGCCGCTAATCTGCACGGGATTGG-3'   |                  |
| ScPIP2;7  | ScPIP2;7-F         | 5'-ATGTCGAAGGATGACGTGGC-3'                        | pPOTO-ScPIP2;7   |
|           | ScPIP2;7-R         | 5'-TCACACCGTGGCGCTGGTGC-3'                        |                  |
| ScPIP2;7  | pPR3-N-ScPIP2;7-F  | 5'-ATTAACAAGGCCATTACGGCCATGTCGAAGGATGACGTGGC-3'   | pPR3-N-ScPIP2;7  |
|           | pPR3-N-ScPIP2;7-R  | 5'-TTGACTAAGGCCGAGGCGGCCGTCACACCGTGGCGCTGGTGC-3'  |                  |
| ScBGLU31  | ScBGLU31-F         | 5'-ATGGTGGAGCTGACACCGCGTG-3'                      | pPOTO-ScBGLU31   |
|           | ScBGLU31-R         | 5'-TCACTCCGAATAGGTGGAGC-3'                        |                  |
| ScBGLU31  | pPR3-N-ScBGLU31-F  | 5'-ATTAACAAGGCCATTACGGCCATGGTGGAGCTGACACCGCGTG-3' | pPR3-N-ScBGLU31  |
|           | pPR3-N-ScBGLU31-R  | 5'-TTGACTAAGGCCGAGGCGGCCGTCACCTCCGAATAGGTGGAGC-3' |                  |
| ScGONST4  | ScGONST4-F         | 5'-ATGGCAAAGCAGTATTACG-3'                         | pPOTO-ScGONST4   |
|           | ScGONST4-R         | 5'-TTAGGTTGTTCCATCAGGCT-3'                        |                  |
| ScGONST4  | pPR3-N-ScGONST4-F  | 5'-ATTAACAAGGCCATTACGGCCATGGCAAAGCAGTATTACG-3'    | pPR3-N-ScGONST4  |
|           | pPR3-N-ScGONST4-R  | 5'-TTGACTAAGGCCGAGGCGGCCGTTAGGTTGTTCCATCAGGCT-3'  |                  |
| ScPMP22   | ScPMP22-F          | 5'-ATGGCGGCGGCGTCGGCGTC-3'                        | pPOTO-ScPMP22    |
|           | ScPMP22-R          | 5'-CTATGTGGAGTTGTCCTTTG-3'                        |                  |
| ScPMP22   | pPR3-N-ScPMP22-F   | 5'-ATTAACAAGGCCATTACGGCCATGGCGGCGGCGTCGGCGTC-3'   | pPR3-N-ScPMP22   |
|           | pPR3-N-ScPMP22-R   | 5'-TTGACTAAGGCCGAGGCGGCCGCTATGTGGAGTTGTCCTTTG-3'  |                  |

|            |                     |                                                  |                   |
|------------|---------------------|--------------------------------------------------|-------------------|
| ScVTE3     | ScVTE3-F            | 5'-ATGCCCTCCACCTACGCGC-3'                        | pPOTO-ScVTE3      |
|            | ScVTE3-R            | 5'-TCAGATTGGCATGCCTTTTG-3'                       |                   |
| ScVTE3     | pPR3-N-ScVTE3-F     | 5'-ATTAACAAGGCCATTACGGCCATGCCCTCCACCTACGCGC-3'   | pPR3-N-ScVTE3     |
|            | pPR3-N-ScVTE3-R     | 5'-TTGACTAAGGCCGAGGCGGCCGTCAGATTGGCATGCCTTTTG-3' |                   |
| ScZIFL1    | ScZIFL1-F           | 5'-ATGGCCGGCGGTGGCGGCGA-3'                       | pPOTO-ScZIFL1     |
|            | ScZIFL1-R           | 5'-TTATGAATGCCTCATTGAAT-3'                       |                   |
| ScZIFL1    | pPR3-N-ScZIFL1-F    | 5'-ATTAACAAGGCCATTACGGCCATGGCCGGCGGTGGCGGCGA-3'  | pPR3-N-ScZIFL1    |
|            | pPR3-N-ScZIFL1-R    | 5'-TTGACTAAGGCCGAGGCGGCCGTTATGAATGCCTCATTGAAT-3' |                   |
| ScTIP1;2   | ScTIP1;2-F          | 5'-ATGCCGGTGAGCAGGATCG-3'                        | pPOTO-ScScTIP1;2  |
|            | ScTIP1;2-R          | 5'-TCAGTAGTCTGCGGTGGGCA-3'                       |                   |
| ScTIP1;2   | pPR3-N-ScTIP1;2-F   | 5'-ATTAACAAGGCCATTACGGCCATGCCGGTGAGCAGGATCG-3'   | pPR3-N-ScTIP1;2   |
|            | pPR3-N-ScTIP1;2-R   | 5'-TTGACTAAGGCCGAGGCGGCCGTCAGTAGTCTGCGGTGGGCA-3' |                   |
| ScTPT      | ScTPT-F             | 5'-ATGTCGGCGCTCGGAACGCT-3'                       | pPOTO-ScTPT       |
|            | ScTPT-R             | 5'-TCATGCGCTCTTTTTCCTTT-3'                       |                   |
| ScTPT      | pPR3-N-ScTPT-F      | 5'-ATTAACAAGGCCATTACGGCCATGTCGGCGCTCGGAACGCT-3'  | pPR3-N-ScTPT      |
|            | pPR3-N-ScTPT-R      | 5'-TTGACTAAGGCCGAGGCGGCCGTCATGCGCTCTTTTTCCTTT-3' |                   |
| ScRNS4     | ScRNS4 -F           | 5'-ATGGGAGGCCGCAGAACAAT-3'                       | pPOTO-ScRNS4      |
|            | ScRNS4 -R           | 5'-TGCTCCCCACTCAGACCATG-3'                       |                   |
| ScRNS4     | pPR3-N-ScRNS4 -F    | 5'-ATTAACAAGGCCATTACGGCCATGGGAGGCCGCAGAACAAT-3'  | pPR3-N-ScRNS4     |
|            | pPR3-N-ScRNS4 -R    | 5'-TTGACTAAGGCCGAGGCGGCCGTGCTCCCCACTCAGACCATG-3' |                   |
| ScSULTR3-3 | ScSULTR3-3-F        | 5'-ATGGTGGGTATGAGAGGTGC-3'                       | pPOTO-ScSULTR3-3  |
|            | ScSULTR3-3-R        | 5'-TTAGGGTTTTGTCATCTTGG-3'                       |                   |
| ScSULTR3-3 | pPR3-N-ScSULTR3-3-F | 5'-ATTAACAAGGCCATTACGGCCATGGTGGGTATGAGAGGTGC-3'  | pPR3-N-ScSULTR3-3 |
|            | pPR3-N-ScSULTR3-3-R | 5'-TTGACTAAGGCCGAGGCGGCCGTTAGGGTTTTGTCATCTTGG-3' |                   |
| ScPPT2     | ScPPT2-F            | 5'-ATGCAGAGCGCCGCGGCTCT-3'                       | pPOTO-ScPPT2      |
|            | ScPPT2-R            | 5'-TTAAGAAGTCTTCGGCTTGG-3'                       |                   |

|           |                    |                                                         |                  |
|-----------|--------------------|---------------------------------------------------------|------------------|
| ScPPT2    | pPR3-N-ScPPT2-F    | 5'-ATTAACAAGGCCATTACGGCCATGCAGAGCGCCGCGGCTCT-3'         | pPR3-N-ScPPT2    |
|           | pPR3-N-ScPPT2-R    | 5'-TTGACTAAGGCCGAGGCGGCCGTTAAGAAGTCTTCGGCTTGG-3'        |                  |
| ScCAB1    | ScCAB1-F           | 5'-ATGCAGAGCGCCGCGGCTCT-3'                              | pPOTO-ScCAB1     |
|           | ScCAB1-R           | 5'-TCACTTGCCGGGCACGAAGT-3'                              |                  |
| ScCAB1    | pPR3-N-ScCAB1-F    | 5'-ATTAACAAGGCCATTACGGCCATGCAGAGCGCCGCGGCTCT-3'         | pPR3-N-ScCAB1    |
|           | pPR3-N-ScCAB1-R    | 5'-TTGACTAAGGCCGAGGCGGCCGTCACTTGCCGGGCACGAAGT-3'        |                  |
| ScNCX     | ScNCX-F            | 5'-ATGTCGACTCGCCGGCAGCA-3'                              | pPOTO-ScNCX      |
|           | ScNCX-R            | 5'-CTATGACCAGCCAAAGACAT-3'                              |                  |
| ScNCX     | pPR3-N-ScNCX-F     | 5'-ATTAACAAGGCCATTACGGCCATGTCGACTCGCCGGCAGCA-3'         | pPR3-N-ScNCX     |
|           | pPR3-N-ScNCX-R     | 5'-TTGACTAAGGCCGAGGCGGCCGCTATGACCAGCCAAAGACAT-3'        |                  |
| ScSERINC3 | ScSERINC3-F        | 5'-ATGTGGGCGGCGTCGTGCCT-3'                              | pPOTO-ScSERINC3  |
|           | ScSERINC3-R        | 5'-CTAGAATTCCTGTCAGGAA-3'                               |                  |
| ScSERINC3 | pPR3-N-ScSERINC3-F | 5'-ATTAACAAGGCCATTACGGCCATGTGGGCGGCGTCGTGCCT-3'         | pPR3-N-ScSERINC3 |
|           | pPR3-N-ScSERINC3-R | 5'-TTGACTAAGGCCGAGGCGGCCGCTAGAATTCCTGTCAGGAA-3'         |                  |
| ScULP5    | ScULP5-F           | 5'-ATGATCGAGGTGGTGCTGAACGA-3'                           | pPOTO-ScULP5     |
|           | ScULP5-R           | 5'-CTAGTTGTAGTAGAGCTCGAGCC-3'                           |                  |
| ScULP5    | pPR3-N-ScULP5-F    | 5'-ATTAACAAGGCCATTACGGCCATGATCGAGGTGGTGCTGAACGA-3'      | pPR3-N-ScULP5    |
|           | pPR3-N-ScULP5-R    | 5'-TTGACTAAGGCCGAGGCGGCCGCTAGTTGTAGTAGAGCTCGAGCC-3'     |                  |
| ScHTA2    | ScHTA2-F           | 5'-ATGGCCGGGAGAGGTAAGGCGATC-3'                          | pPOTO-ScHTA2     |
|           | ScHTA2-R           | 5'-CTAGTCCTCATCGCCAGCCGCGGCCTT-3'                       |                  |
| ScHTA2    | pPR3-N-ScHTA2-F    | 5'-ATTAACAAGGCCATTACGGCCATGGCCGGGAGAGGTAAGGCGATC-3'     | pPR3-N-ScHTA2    |
|           | pPR3-N-ScHTA2-R    | 5'-TTGACTAAGGCCGAGGCGGCCGCTAGTCCTCATCGCCAGCCGCGGCCTT-3' |                  |
| ScTSPAN18 | ScTSPAN18-F        | 5'-ATGGCGCGTCGCCGGAGCAG-3'                              | pPOTO-ScTSPAN18  |
|           | ScTSPAN18-R        | 5'-TCACTGAGACGGTGCTGCAT-3'                              |                  |
| ScTSPAN18 | pPR3-N-ScTSPAN18-F | 5'-ATTAACAAGGCCATTACGGCCATGGCGCGTCGCCGGAGCAG-3'         | pPR3-N-ScTSPAN18 |
|           | pPR3-N-ScTSPAN18-R | 5'-TTGACTAAGGCCGAGGCGGCCGTCACTGAGACGGTGCTGCAT-3'        |                  |

|         |                  |                                                  |                |
|---------|------------------|--------------------------------------------------|----------------|
| ScHSP82 | ScHSP82-F        | 5'-ATGGCCTCGGAGACGGAGAC-3'                       | pPOTO-ScHSP82  |
|         | ScHSP82-R        | 5'-TTAGTCGACCTCCTCCATC-3'                        |                |
| ScHSP82 | pPR3-N-ScHSP82-F | 5'-ATTAACAAGGCCATTACGGCCATGGCCTCGGAGACGGAGAC-3'  | pPR3-N-ScHSP82 |
|         | pPR3-N-ScHSP82-R | 5'-TTGACTAAGGCCGAGGCGGCCGTTAGTCGACCTCCTCCATCT-3' |                |
